# Supplementary material for: Preparatory Conditions Optimization and Characterization of Hierarchical Porous Carbon from Seaweed as Carbon-Precursor Using a Box—Behnken Design for Application of Supercapacitor
Source: MDPI journal article supplement (doi:10.3390/ma15165748), 2022-08-20
Supplement: s1 [file s1]

Supplementary ,material

# **Preparatory Conditions Optimization and Characterization of Hierarchical Porous Carbon from Seaweed as Carbon-Precursor Using a Box—Behnken Design for Application of Supercapacitor**

Wein-Duo Yang <sup>1,\*</sup>, Jing-Xuan Wang <sup>1</sup>, Yu-Tse Wu <sup>2</sup>, Hsun-Shuo Chang <sup>2</sup> and Horng-Huey Ko <sup>2</sup>

<sup>1</sup> Department of Chemical and Materials Engineering, National Kaohsiung University of Science and

Technology, Kaohsiung City 807, Taiwan

<sup>2</sup> School of Pharmacy, College of Pharmacy, Kaohsiung Medical University, Kaohsiung City 807, Taiwan

\* Correspondence: ywd@nkust.edu.tw

**Table S1.** A part of the DOE experimental result.

| Std. No. | Run | A<br>Temperature<br>(°C) | B<br>Time<br>(min) | C<br>NaCl/SW<br>(weight ratio) | D<br>Water/SW<br>(weight ratio) | Response<br>Specific Capacitance<br>(F/g) | $\sigma$ of $C_s$<br>(F/g) |
|----------|-----|--------------------------|--------------------|--------------------------------|---------------------------------|-------------------------------------------|----------------------------|
| 25       | 1   | 700                      | 60                 | 3                              | 10                              | 99.8 ( $\pm 1.4$ )                        | 3.1                        |
| 19       | 2   | 600                      | 60                 | 5                              | 10                              | 86.3 ( $\pm 1.9$ )                        | 4.3                        |
| 22       | 3   | 700                      | 90                 | 4                              | 7.5                             | 87.9 ( $\pm 1.4$ )                        | 3.1                        |
| 9        | 4   | 600                      | 60                 | 4                              | 7.5                             | 76.9 ( $\pm 1.7$ )                        | 3.8                        |
| 4        | 5   | 800                      | 90                 | 4                              | 10                              | 54.1 ( $\pm 0.7$ )                        | 1.6                        |
| 6        | 25  | 700                      | 60                 | 5                              | 7.5                             | 69.7 ( $\pm 2.3$ )                        | 5.1                        |

For example, the run 1 of electrode prepared from the conditions of A, B, C, and D, the specific capacitance ( $C_s$ ) was measured 5 times by GCD test. The specific capacitance of run 1 electrode was measured at 96.6 F g<sup>-1</sup>, 97.7 F g<sup>-1</sup>, 98.4 F g<sup>-1</sup>, 102.7 F g<sup>-1</sup>, and 103.6 F g<sup>-1</sup>, respectively. The data are calculated by statistical method as follows.

The experimental data is expressed as follows:

$$x = \bar{X} \pm \sigma_{\bar{X}} \quad (1)$$

x: Results of multiple capacitance (here is  $C_s$ )

$\bar{X}$  : mean of measured data

$\sigma_{\bar{X}}$ : standard error of the mean

$\sigma$ : standard deviation of the data

$$\begin{aligned} \bar{X} &= (96.6 + 97.7 + 98.4 + 102.7 + 103.6) \div 5 \\ &= 99.8 \end{aligned}$$

For a limited number of specific capacitance, n= 5

$$\sigma = \sqrt{\frac{\sum d_i^2}{(n-1)}} \quad (2)$$

$$\sigma_{\bar{X}} = \sqrt{\frac{\sum d_i^2}{n(n-1)}} \quad (3)$$

$$d = x - \bar{X} \quad (4)$$

$$\begin{aligned} \sigma &= \sqrt{\frac{(96.6-99.8)^2 + (97.7-99.8)^2 + (98.4-99.8)^2 + (102.7-99.8)^2 + (103.6-99.8)^2}{(5-1)}} \\ &= 3.1 \end{aligned} \quad (5)$$

$$\begin{aligned} \sigma_{\bar{X}} &= \sqrt{\frac{(96.6-99.8)^2 + (97.7-99.8)^2 + (98.4-99.8)^2 + (102.7-99.8)^2 + (103.6-99.8)^2}{5 \times (5-1)}} \\ &= 1.4 \end{aligned} \quad (6)$$

$$\begin{aligned} C_s = x &= \bar{X} \pm \sigma_{\bar{X}} \\ &= 99.8 \pm 1.4 \end{aligned} \quad (1)$$

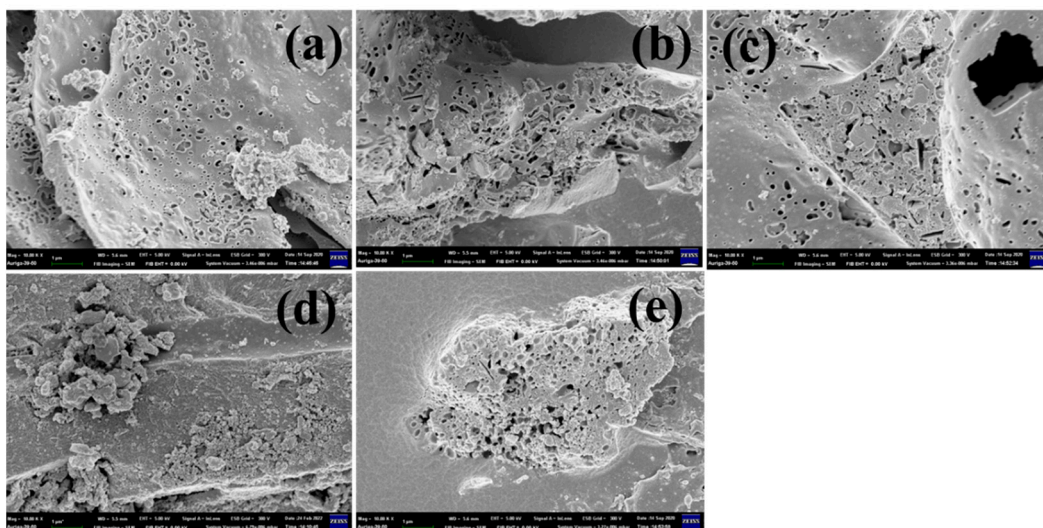

**Figure S1.** The surface morphology of activated carbon samples examined by SEM on magnification of 10,000 (a) run 15, (b) run 20, (c) run 21, (d) run 2, (e) optimal.

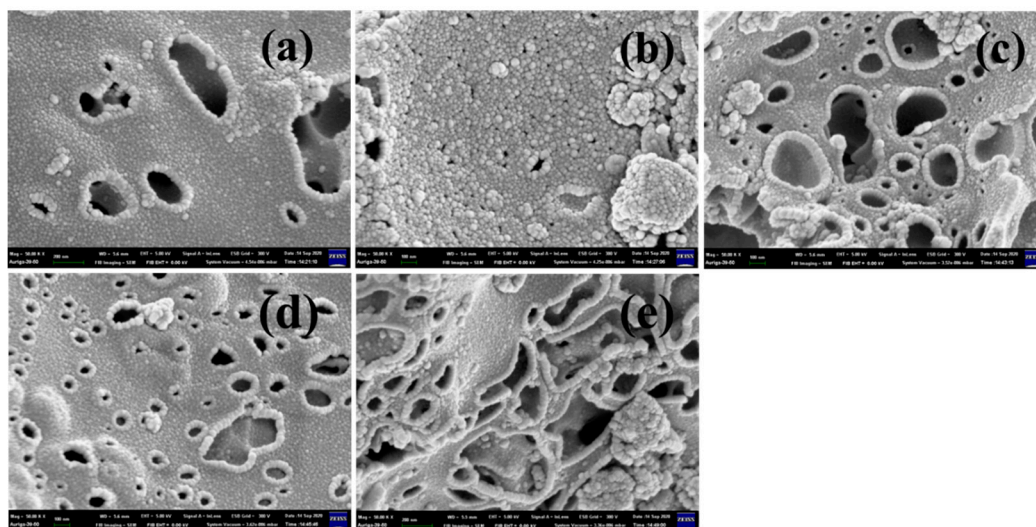

**Figure S2.** The surface morphology of activated carbon samples examined by SEM on magnification of 50,000 (a) run 15, (b) run 20, (c) run 21, (d) run 2, (e) optimal.

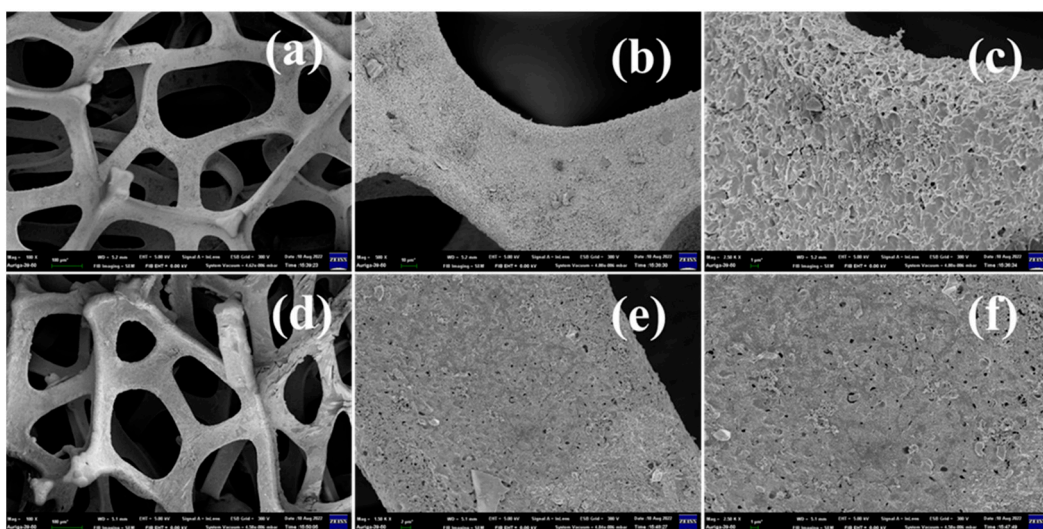

**Figure S3.** The optimal electrode examined by SEM before/after 10,000 charge/discharge cycles test. Before test on magnification at 150, 1500, and 2500, respectively(a, b, c); after test on magnification at 150, 1500, and 2500, respectively (d, e, f).
